# Supplementary material
Source: PubMed Central journal article supplement (PMC3811400)
Supplement: AAC.00603-13_zac010132187so1.pdf [file AAC.00603-13_zac010132187so1.pdf]

## Supplementary materials and methods

### Synthesis of N5-Pan and N7-Pan

#### (R)-3-(2,2,5,5-tetramethyl-1,3-dioxane-4-carboxamido)propanoic acid (**1**)

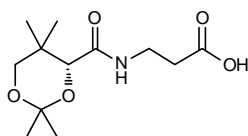

To a cooled solution (0 °C) of (R)-pantothenic acid (20.8 g, 94.0 mmol) in acetone (500 mL) were added subsequently 2-methoxyprop-1-ene (27.1 mL, 283 mmol) and pTsOH·H<sub>2</sub>O (0.89 g, 4.72 mmol). After 15 min the temperature was raised to room temperature and the mixture was stirred for another 30 min. The mixture was diluted with saturated aqueous NaHCO<sub>3</sub> (10 mL) and concentrated *in vacuo* to yield **1** as a yellow solid, which was used without purification. TLC (CH<sub>2</sub>Cl<sub>2</sub>:MeOH, 9:1 v/v): R<sub>f</sub> = 0.67. Spectral data were in correspondence with reported data in literature (Sewell *et al.* Org. Lett. **13**, 800-803 (2011)).

#### (R)-N-{3-[methoxy(methyl)amino]-3-oxopropyl}-2,2,5,5-tetramethyl-1,3-dioxane-4-carboxamide (**2**)

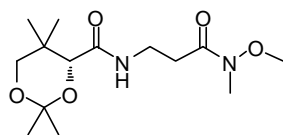

To a solution of **1** (1.80 g, 6.92 mmol) in dry CH<sub>2</sub>Cl<sub>2</sub> (65 mL) at rt were added, EDC (2.09 g, 1.5 equiv), *N,O*-dimethylhydroxylamine hydrochloride (1.04 g, 1.5 equiv) and DIPEA (3.43 mL, 3.0 equiv), followed by DMAP (483 mg, 0.5 equiv). The reaction mixture was stirred over night at rt, quenched with saturated aqueous NH<sub>4</sub>Cl (40 mL), extracted with CH<sub>2</sub>Cl<sub>2</sub> (3 × 50 mL), dried (Na<sub>2</sub>SO<sub>4</sub>), and concentrated *in vacuo*. The product was purified by column chromatography (MeOH/CH<sub>2</sub>Cl<sub>2</sub>, 0:1→1:4) to afford **2** (1.90 g, 91% yield) as a colorless oil. R<sub>f</sub> 0.56 (MeOH/CH<sub>2</sub>Cl<sub>2</sub>, 1:9). [α]<sub>D</sub><sup>20</sup> +44.5 (*c* 1.32, CH<sub>2</sub>Cl<sub>2</sub>). IR (ATR) 3417, 3334, 2980, 2940, 2871, 1661, 1520, 1378, 1196, 1095, 873 cm<sup>-1</sup>. <sup>1</sup>H NMR (CDCl<sub>3</sub>, 400 MHz): δ 7.13 (t, *J* = 5.7 Hz, 1H), 4.07 (s, 1H), 3.68 (d, *J* = 11.7 Hz, 1H), 3.67 (s, 3H), 3.64-3.48 (m, 2H), 3.27 (d, *J* = 11.7 Hz, 1H), 3.18 (s, 3H), 2.76-2.59 (m, 2H), 1.46 (s, 3H), 1.42 (s, 3H), 1.03 (s, 3H), 0.96 (s, 3H). <sup>13</sup>C NMR (CDCl<sub>3</sub>, 75 MHz): δ 169.9, 99.1, 77.3, 71.6, 61.4, 34.2, 33.1, 32.3, 31.9, 29.6, 22.3, 19.0, 18.8. HRMS (ESI) *m/z* calcd for C<sub>14</sub>H<sub>26</sub>N<sub>2</sub>O<sub>5</sub> (M+Na)<sup>+</sup>: 325.1739, found: 325.1746.

**(R)-2,2,5,5-tetramethyl-N-[3-oxo-3-(pentylamino)propyl]-1,3-dioxane-4-carboxamide (3)**

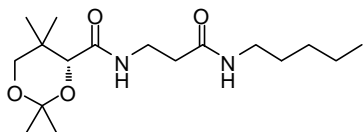

Prepared as described for **2**, starting from **1** (3.40 g, 13.1 mmol) and *n*-amylamine (2.30 mL, 1.5 equiv). Column chromatography (EtOAc/heptane, 0:1→4:1) afforded **3** (1.89 g, 44% yield) as a white solid.  $R_f$  0.56 (MeOH/CH<sub>2</sub>Cl<sub>2</sub>, 1:9). Mp 81.5 °C.  $[\alpha]_D^{20}$  +41.6 (*c* 1.01, CH<sub>2</sub>Cl<sub>2</sub>). IR (ATR) 3430, 3317, 3300, 2954, 2931, 2868, 1649, 1526, 1463, 1377, 1197, 1098, 873 cm<sup>-1</sup>. <sup>1</sup>H NMR (CDCl<sub>3</sub>, 400 MHz):  $\delta$  7.02 (t, *J* = 5.2 Hz, 1H), 5.88-5.84 (m, 1H), 4.07 (s, 1H), 3.68 (d, *J* = 11.7 Hz, 1H), 3.64-3.46 (m, 2H), 3.28 (d, *J* = 11.7 Hz, 1H), 3.26-3.21 (m, 2H), 2.43 (t, *J* = 6.2 Hz, 2H), 1.49 (dt, *J* = 7.3, 14.6 Hz, 2H), 1.46 (s, 3H), 1.42 (s, 3H), 1.38-1.24 (m, 4H), 1.04 (s, 3H), 0.97 (s, 3H), 0.90 (t, *J* = 6.8 Hz, 3H). <sup>13</sup>C NMR (CDCl<sub>3</sub>, 75 MHz):  $\delta$  170.9, 170.3, 99.2, 77.3, 71.6, 39.7, 36.4, 35.1, 33.1, 29.6, 29.4, 29.2, 22.5, 22.3, 19.0, 18.8, 14.1. HRMS (ESI) *m/z* calcd for C<sub>17</sub>H<sub>33</sub>N<sub>2</sub>O<sub>4</sub> (M+H)<sup>+</sup>: 329.2440, found: 329.2426.

**(R)-N-[3-(heptylamino)-3-oxopropyl]-2,2,5,5-tetramethyl-1,3-dioxane-4-carboxamide (4)**

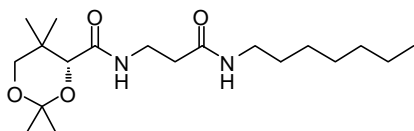

Prepared as described for **2**, starting from **1** (4.50 g, 17.4 mmol) and *n*-heptylamine (3.90 mL, 1.5 equiv). Column chromatography (EtOAc/heptane, 1:2→1:0) afforded **4** (3.15 g, 51% yield) as a colorless oil.  $R_f$  0.56 (MeOH/CH<sub>2</sub>Cl<sub>2</sub>, 1:9).  $[\alpha]_D^{20}$  +39.4 (*c* 1.00, CH<sub>2</sub>Cl<sub>2</sub>). IR (ATR) 3425, 3321, 2927, 2863, 1650, 1526, 1459, 1377, 1196, 1098, 875 cm<sup>-1</sup>. <sup>1</sup>H NMR (CDCl<sub>3</sub>, 400 MHz):  $\delta$  7.04 (t, *J* = 5.9 Hz, 1H), 6.03 (t, *J* = 4.9 Hz, 1H), 4.06 (s, 1H), 3.68 (d, *J* = 11.7 Hz, 1H), 3.63-3.46 (m, 2H), 3.28 (d, *J* = 11.7 Hz, 1H), 3.26-3.20 (m, 2H), 2.42 (t, *J* = 6.2 Hz, 2H), 1.53-1.47 (m, 2H), 1.46 (s, 3H), 1.41 (s, 3H), 1.32-1.24 (m, 8H), 1.03 (s, 3H), 0.97 (s, 3H), .88 (t, *J* = 6.9 Hz, 3H). <sup>13</sup>C NMR (CDCl<sub>3</sub>, 75 MHz):  $\delta$  170.8, 170.2, 99.1, 77.1, 71.5, 39.6, 36.2, 35.0, 33.0, 31.7, 29.6, 29.5, 29.0, 26.9, 22.6, 22.2, 18.9, 18.7, 14.1. HRMS (ESI) *m/z* calcd for C<sub>19</sub>H<sub>37</sub>N<sub>2</sub>O<sub>4</sub> (M+H)<sup>+</sup>: 357.2753, found: 357.2747.

**(R)-2,4-dihydroxy-3,3-dimethyl-N-[3-oxo-3-(pentylamino)propyl]butanamide (N5-Pan, 5)**

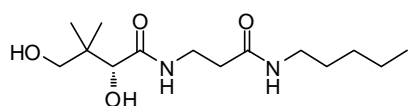

To a solution of **3** (30 mg, 0.10 mmol) in MeCN (1.0 mL) was added, BiCl<sub>3</sub> (6.5 mg, 20 mol%), followed by distilled H<sub>2</sub>O (36 μL, 20 equiv). The reaction was stirred at rt for 4 h, then filtered and concentrated *in vacuo*. After dilution with EtOAc (10 mL), the reaction mixture was washed with saturated aqueous NaHCO<sub>3</sub> (2 × 8 mL) and the aqueous layer was extracted with EtOAc (3 × 8 mL). The organic layers were combined, dried (Na<sub>2</sub>SO<sub>4</sub>), and concentrated *in vacuo*. The product was purified by column chromatography (EtOAc/heptane, 1:1→1:0) to afford **5** (1.22 g, 75% yield) as a white solid. R<sub>f</sub> 0.46 (MeOH/CH<sub>2</sub>Cl<sub>2</sub>, 1:9). Mp 89.4 °C. [α]<sub>D</sub><sup>20</sup> +29.7 (*c* 1.00, MeOH). IR (ATR) 3330, 3280, 3088, 2937, 2872, 1642, 1546, 1089, 1033, 691 cm<sup>-1</sup>. <sup>1</sup>H NMR (CD<sub>3</sub>OD, 400 MHz): δ 3.88 (s, 1H), 3.54-3.37 (m, 4H), 3.17-3.13 (m, 2H), 2.41 (t, *J* = 6.7 Hz, 2H), 1.53-1.46 (m, 2H), 1.40-1.27 (m, 4H), 0.94-0.90 (m, 9H). <sup>13</sup>C NMR (CDCl<sub>3</sub>, 75 MHz): δ 174.1, 171.6, 77.5, 70.9, 39.8, 39.4, 35.9, 35.4, 29.2, 22.4, 21.4, 20.6, 14.1 HRMS (ESI) *m/z* calcd for C<sub>14</sub>H<sub>28</sub>N<sub>2</sub>O<sub>4</sub>Na (M+Na)<sup>+</sup>: 311.1947, found: 311.1933.

**(R)-N-[3-(heptylamino)-3-oxopropyl]-2,4-dihydroxy-3,3-dimethylbutanamide (N7-Pan, 6)**

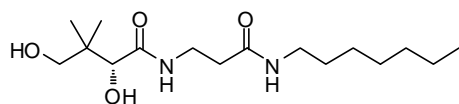

Prepared as described for **5**, starting from **4** (2.90 g, 8.13 mmol). Column chromatography (MeOH/CH<sub>2</sub>Cl<sub>2</sub>, 0:1→1:9) afforded **6** (2.21 g, 86% yield) as a white solid. R<sub>f</sub> 0.47 (MeOH/CH<sub>2</sub>Cl<sub>2</sub>, 1:9). Mp 78.2 °C. [α]<sub>D</sub><sup>20</sup> +26.9 (*c* 1.01, MeOH). IR (ATR) 3352, 2483, 2068, 1119, 973 cm<sup>-1</sup>. <sup>1</sup>H NMR (CD<sub>3</sub>OD, 400 MHz): δ 3.89 (s, 1H), 3.54-3.37 (m, 4H), 3.15 (dt, *J* = 1.2, 6.9 Hz, 2H), 2.41 (t, *J* = 6.7 Hz, 2H), 1.53-1.46 (m, 2H), 1.32-1.31 (m, 8H), 0.92-0.89 (m, 9H). <sup>13</sup>C NMR (CD<sub>3</sub>OD, 75 MHz): δ 176.1, 173.6, 77.3, 70.4, 40.5, 40.4, 36.4, 32.9, 30.4, 30.1, 28.0, 23.7, 21.3, 20.9, 14.4. HRMS (ESI) *m/z* calcd for C<sub>16</sub>H<sub>33</sub>N<sub>2</sub>O<sub>4</sub> (M+H)<sup>+</sup>: 317.2440, found: 317.2429.

**Table S1.** Structure and anti-vanin properties of N5-Pan, N7-Pan and RR6

| Name   | Structure                                                                         | IC <sub>50</sub> (μM) |             |                    |
|--------|-----------------------------------------------------------------------------------|-----------------------|-------------|--------------------|
|        |                                                                                   | Rec. VNN1             | Human serum | Fetal bovine serum |
| N5-Pan | 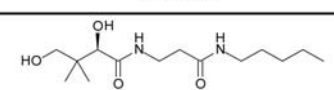 | -                     | -           | -                  |
| N7-Pan |  | -                     | -           | -                  |
| RR6    |  | 0.54                  | 0.040       | 0.041              |

**Table S2.** Complete list of MIC values of N5-Pan and N7-Pan against various bacterial strains

| Species               | Gram staining | Strain                | N5-Pan   | N7-Pan     |      |      |
|-----------------------|---------------|-----------------------|----------|------------|------|------|
| <i>S. aureus</i>      | positive      | Xen8.1                | 8        | 0.5        |      |      |
|                       |               | ATCC6538              | 8        | 0.5        |      |      |
|                       |               | MRSA                  | 8        | 0.5        |      |      |
| <i>S. pneumoniae</i>  | positive      | R6                    | 0.25     | 2          |      |      |
|                       |               | D39                   | 0.5      | 16         |      |      |
|                       |               | TIGR4                 | 0.5      | 8          |      |      |
|                       |               | G54                   | 1        | 32         |      |      |
|                       |               | PMEN-1                | 4        | 16         |      |      |
|                       |               | PMEN-3                | 2        | 32         |      |      |
|                       |               | PMEN-4                | 0.5      | 8          |      |      |
|                       |               | PMEN-9                | 2        | 16         |      |      |
|                       |               | PMEN-13               | 2        | 32         |      |      |
|                       |               | PMEN-14               | 1        | 16         |      |      |
|                       |               | PMEN-15               | 0.5      | 8          |      |      |
|                       |               | PMEN-18               | 1        | 16         |      |      |
|                       |               | PMEN-19               | 0.5      | 16         |      |      |
|                       |               | PMEN-20               | 1        | 32         |      |      |
|                       |               | PMEN-21               | 1        | 16         |      |      |
|                       |               | PMEN-23               | 0.5      | 16         |      |      |
|                       |               | PMEN-24               | 0.5      | 16         |      |      |
|                       |               | PMEN-25               | 1        | 8          |      |      |
|                       |               | <i>S. epidermidis</i> | positive | ATCC12228  | 32   | 1    |
|                       |               | <i>S. agalactiae</i>  | positive | RIVM861352 | >256 | >256 |
| RIVM801284            | >256          |                       |          | >256       |      |      |
| RIVM861167            | >256          |                       |          | >256       |      |      |
| RIVM821256            | >256          |                       |          | >256       |      |      |
| RIVM782651            | >256          |                       |          | >256       |      |      |
| <i>S. pyogenes</i>    | positive      | SS410                 | 1        | 16         |      |      |
|                       |               | SS91                  | 0,5      | 8          |      |      |
|                       |               | SS799                 | 1        | 32         |      |      |
| <i>E. coli</i>        | negative      | BL21                  | 64       | 256        |      |      |
|                       |               | ATCC25922             | 64       | 128        |      |      |
|                       |               | C-1                   | 128      | >256       |      |      |
|                       |               | DH5alpha              | 32       | >256       |      |      |
| <i>K. pneumoniae</i>  | negative      | ATCC43816             | 32       | >256       |      |      |
| <i>M. catarrhalis</i> | negative      | RH4                   | >256     | 128        |      |      |
|                       |               | BBH18                 | >256     | 256        |      |      |
| <i>P. aeruginosa</i>  | negative      | ATCC15692             | >256     | >256       |      |      |
|                       |               | ATCC9027              | >256     | >256       |      |      |
|                       |               | Xen41                 | >256     | >256       |      |      |
